# Supplementary material for: Establishing a multifunctional solid electrolyte interphase on a 3D host by an ultra-fast double coating strategy for stable lithium metal batteries
Source: Royal Society of Chemistry journal article supplement (doi:10.1039/d3ta05963d), 2023-12-11
Supplement: d3ta05963d1.pdf [file d3ta05963d1.pdf]

## Supporting Information

Establishing a multifunctional solid electrolyte interphase on a 3D host by ultra-fast double coating strategy for stable lithium metal batteries

*Ji Young Maeng,<sup>a,†</sup> Minjun Bae,<sup>a,†</sup> Yonghwan Kim,<sup>a</sup> Dohyeong Kim,<sup>a</sup> Yujin Chang,<sup>a</sup> Seungman Park,<sup>a</sup> Juhyung Choi,<sup>b</sup> Eunji Lee,<sup>a</sup> Jeongyeon Lee,<sup>d,\*</sup> Yuanzhe Piao<sup>a,b,c,\*</sup>*

<sup>a</sup> Department of Applied Bioengineering, Graduate School of Convergence Science and Technology, Seoul National University, 145 Gwanggyo-ro, Yeongtong-gu, Suwon-si, Gyeonggi-do, 16229, Republic of Korea

<sup>b</sup> Department of Transdisciplinary Studies, Graduate School of Convergence Science and Technology, Seoul National University, 145 Gwanggyo-ro, Yeongtong-gu, Suwon-si, Gyeonggi-do, 16229, Republic of Korea

<sup>c</sup> Advanced Institutes of Convergence Technology, 145 Gwanggyo-ro, Yeongtong-gu, Suwon-si, Gyeonggi-do, 16229, Republic of Korea

<sup>d</sup> School of Fashion and Textiles, The Hong Kong Polytechnic University, Hung Hom Kowloon, Hong Kong SAR, China

## Corresponding author

\* Yuanzhe Piao: Tel.: +82 31 888 9141; Fax: +82 31 888 9148; E-mail: parkat9@snu.ac.kr

\* Jeongyeon Lee. E-mail: [jaden-jy.lee@polyu.edu.hk](mailto:jaden-jy.lee@polyu.edu.hk)

## Author Contributions

† These authors equally contributed to this work

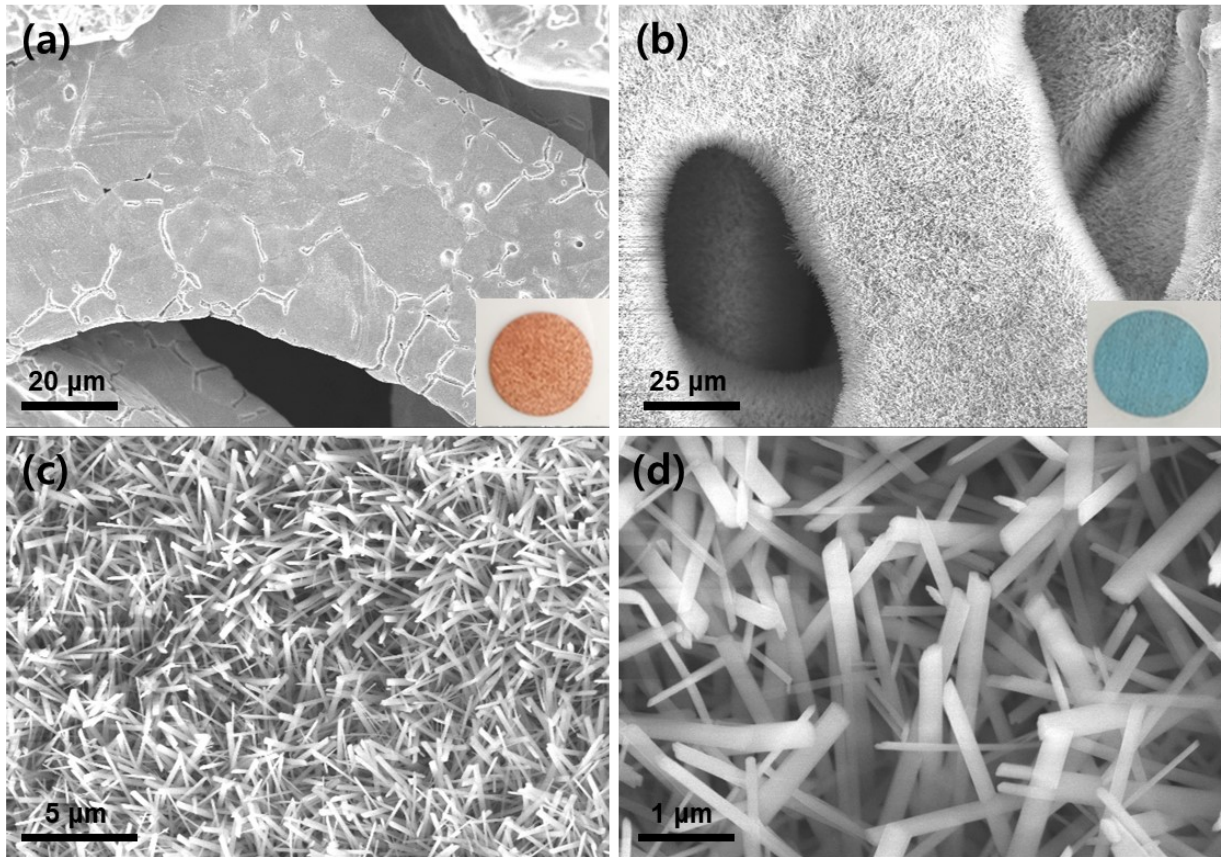

**Fig. S1** SEM images of (a) pristine CF and (b-d) Cu(OH)<sub>2</sub>@CF.

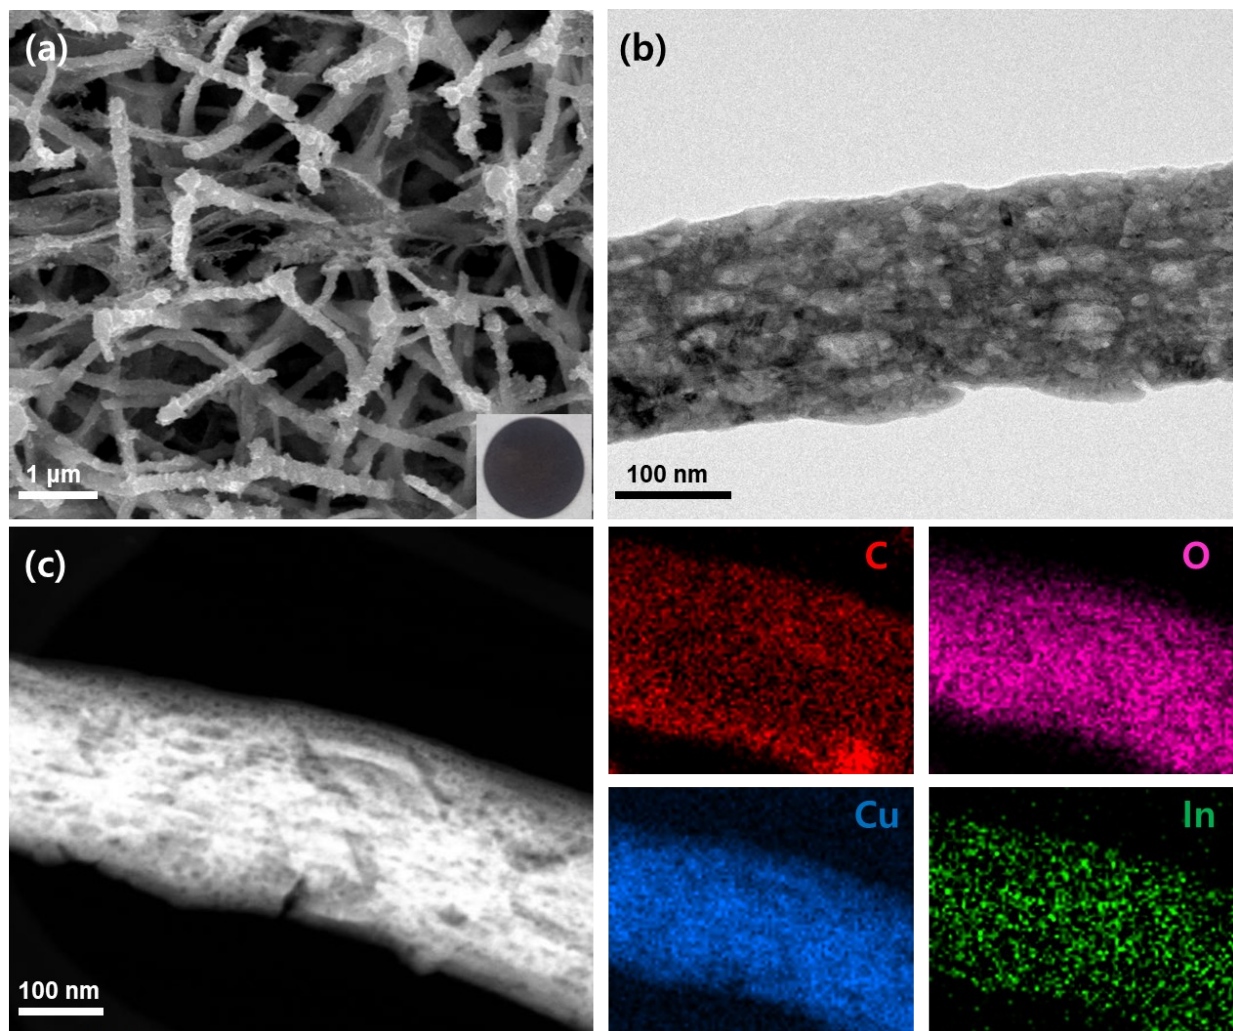

**Fig. S2** (a) SEM, (b) TEM and (c) STEM-HAADF and corresponding EDS images of In@Cu.

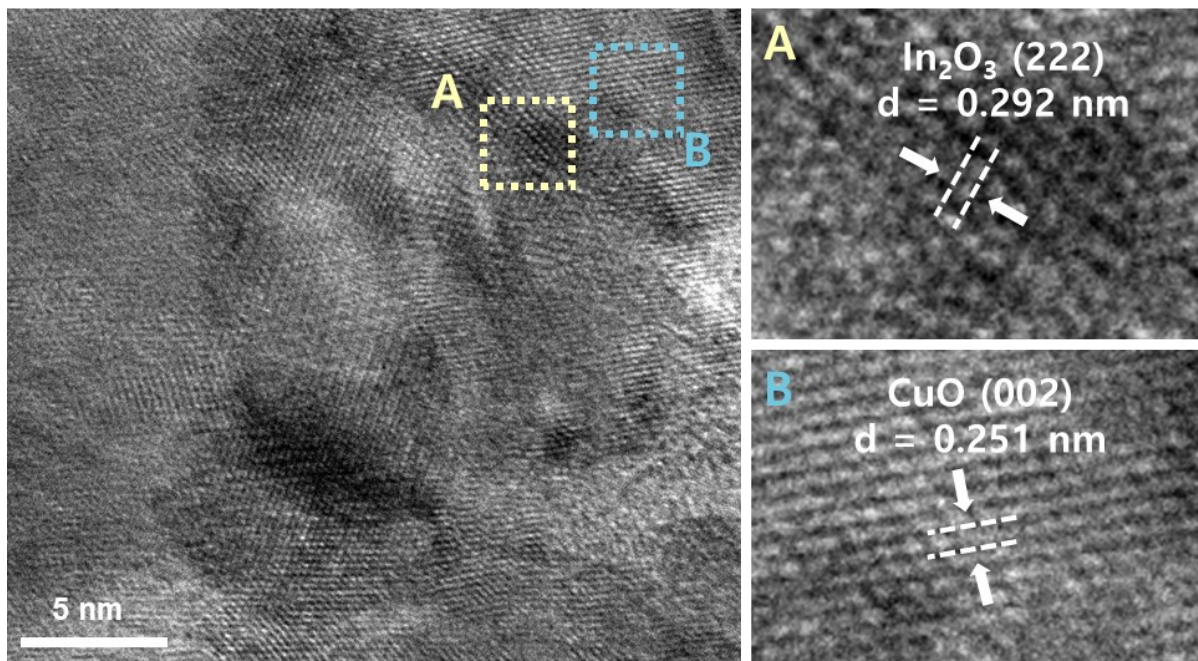

**Fig. S3** HR-TEM images of In@Cu.

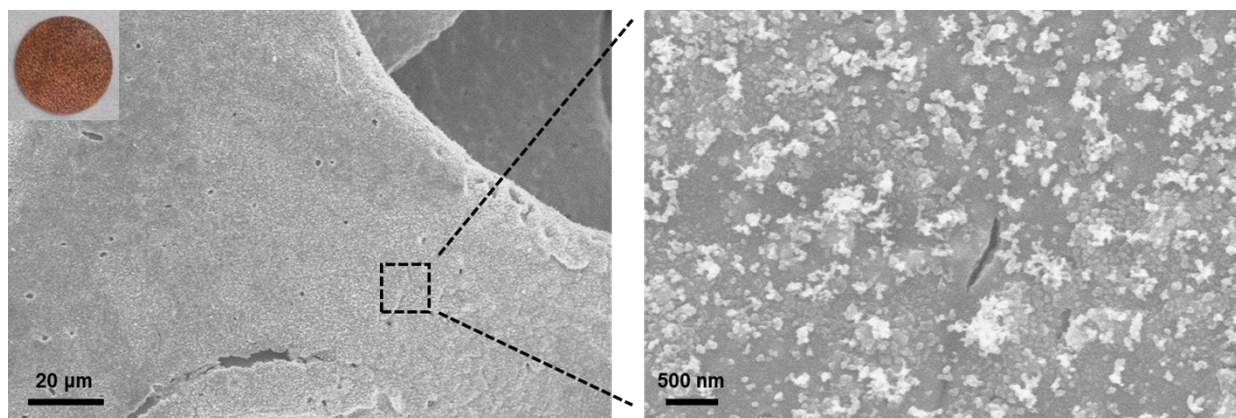

**Fig. S4** SEM images of pristine CF after the flame treatment.

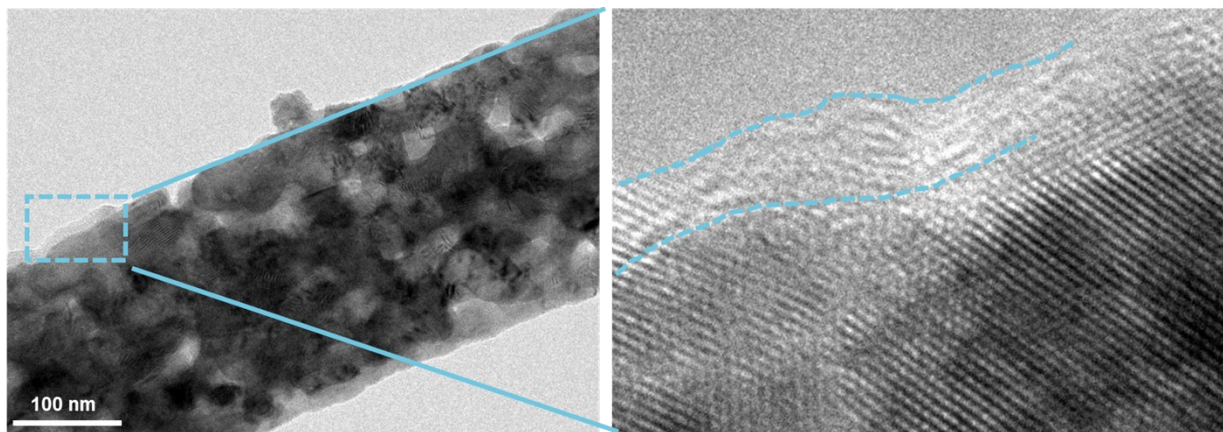

**Fig. S5** TEM images of MSEI@Cu.

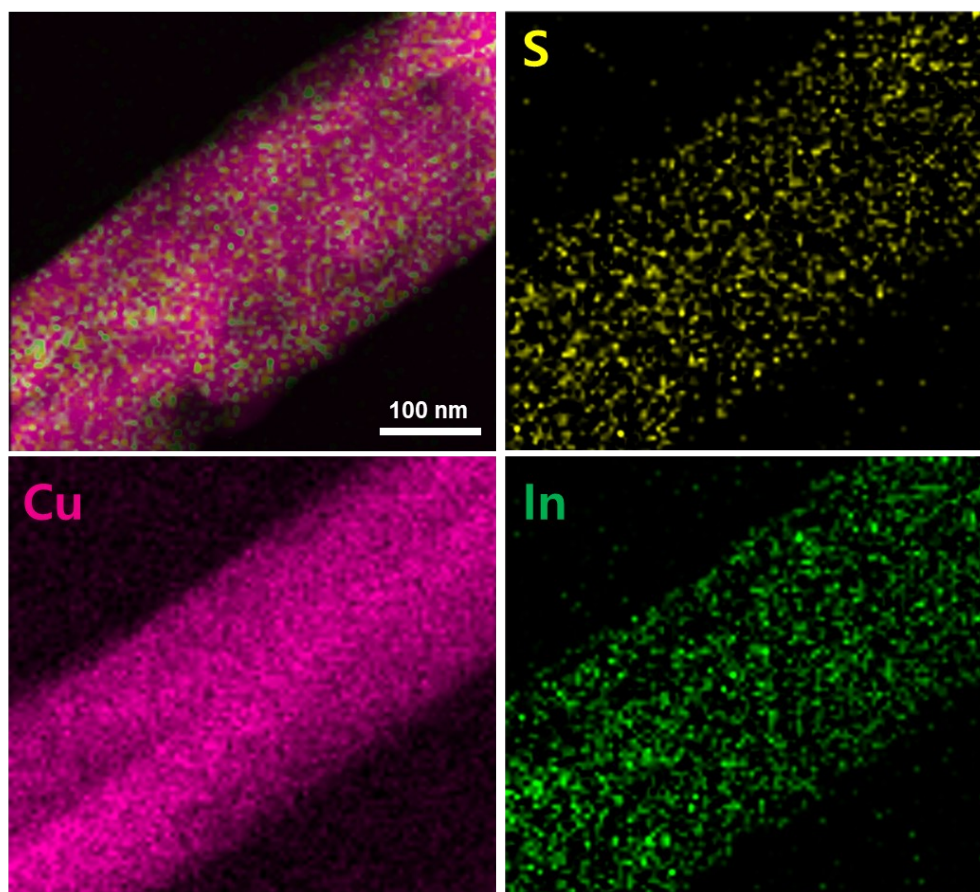

**Fig. S6** The HADF-STEM and corresponding EDS mapping images of MSEI@Cu.

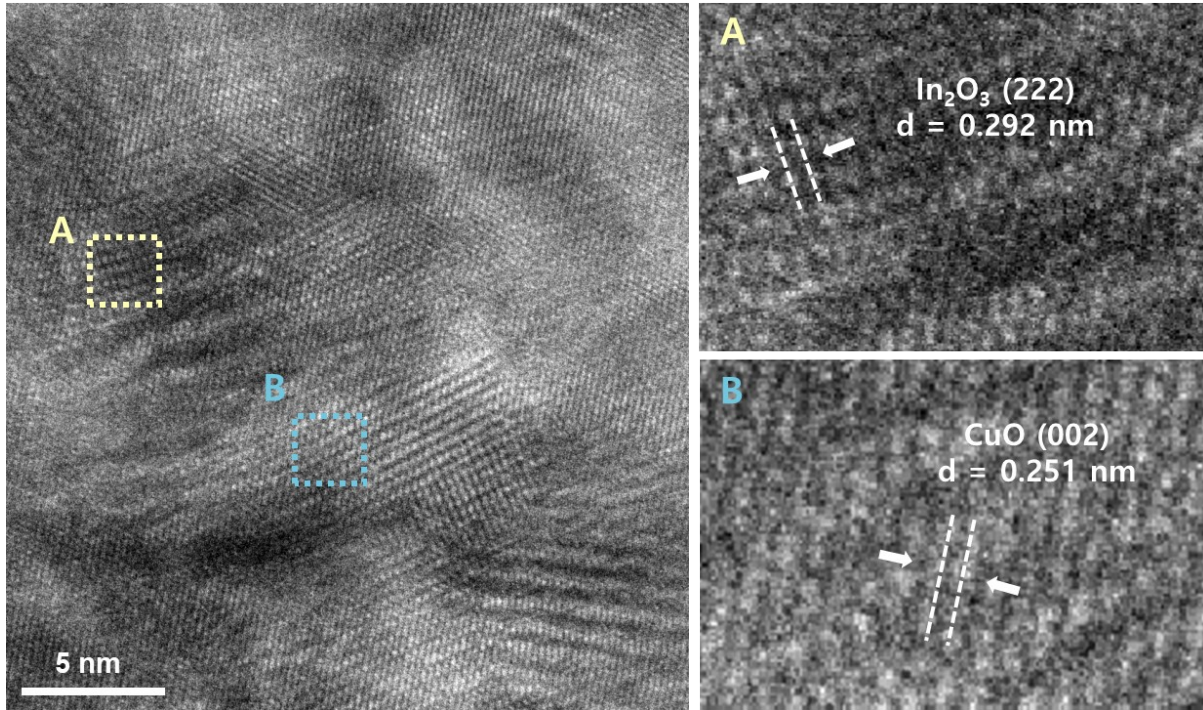

Fig. S7 HR-TEM images of MSEI@Cu.

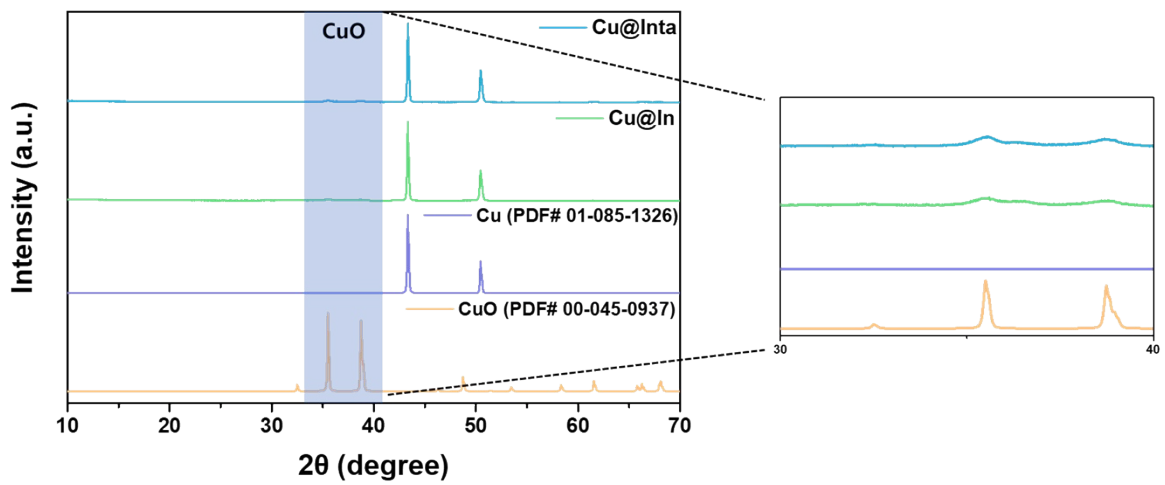

Fig. S8 XRD patterns of MSEI@Cu and In@Cu.

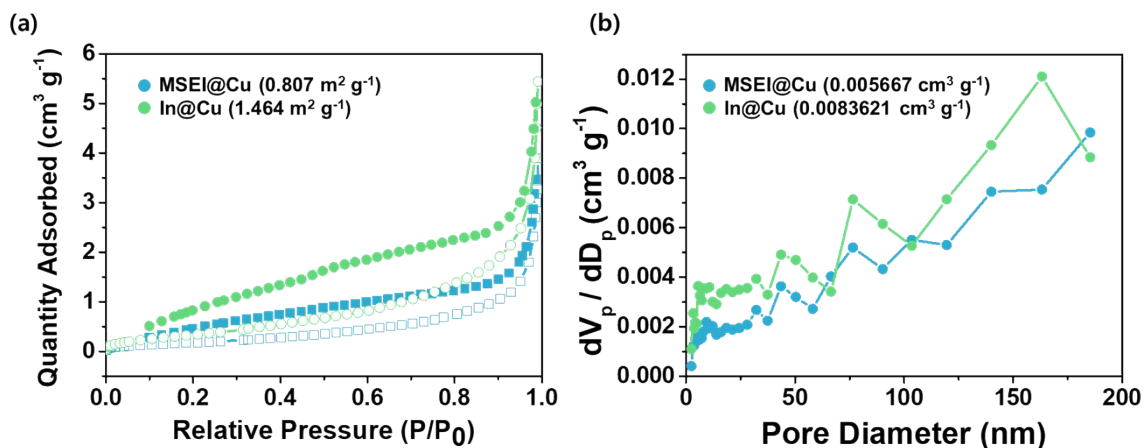

**Fig. S9** (a) N<sub>2</sub> adsorption/desorption isotherms and (b) pore distributions of MSEI@Cu and In@Cu.

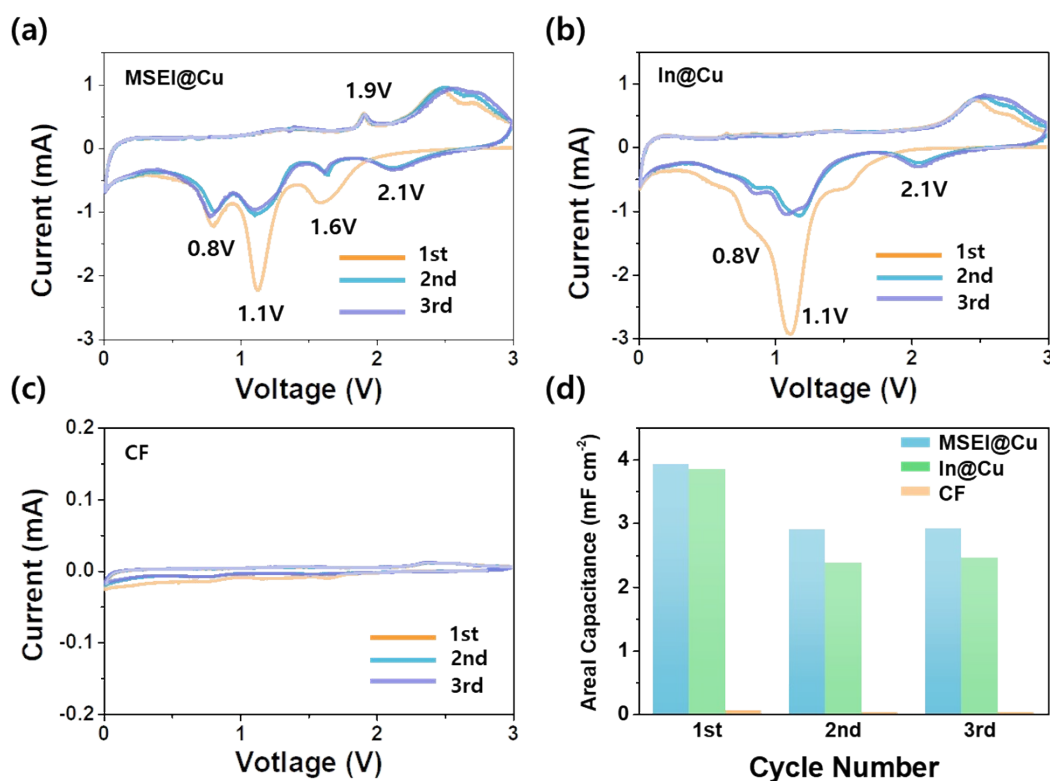

**Fig. S10** The CV profiles of (a) MSEI@Cu, (b) In@Cu and (c) CF at a scanning rate of 0.1 mV s<sup>-1</sup> between 0 and 3 V, and (d) the areal capacitance of each electrode measured at different cycle.



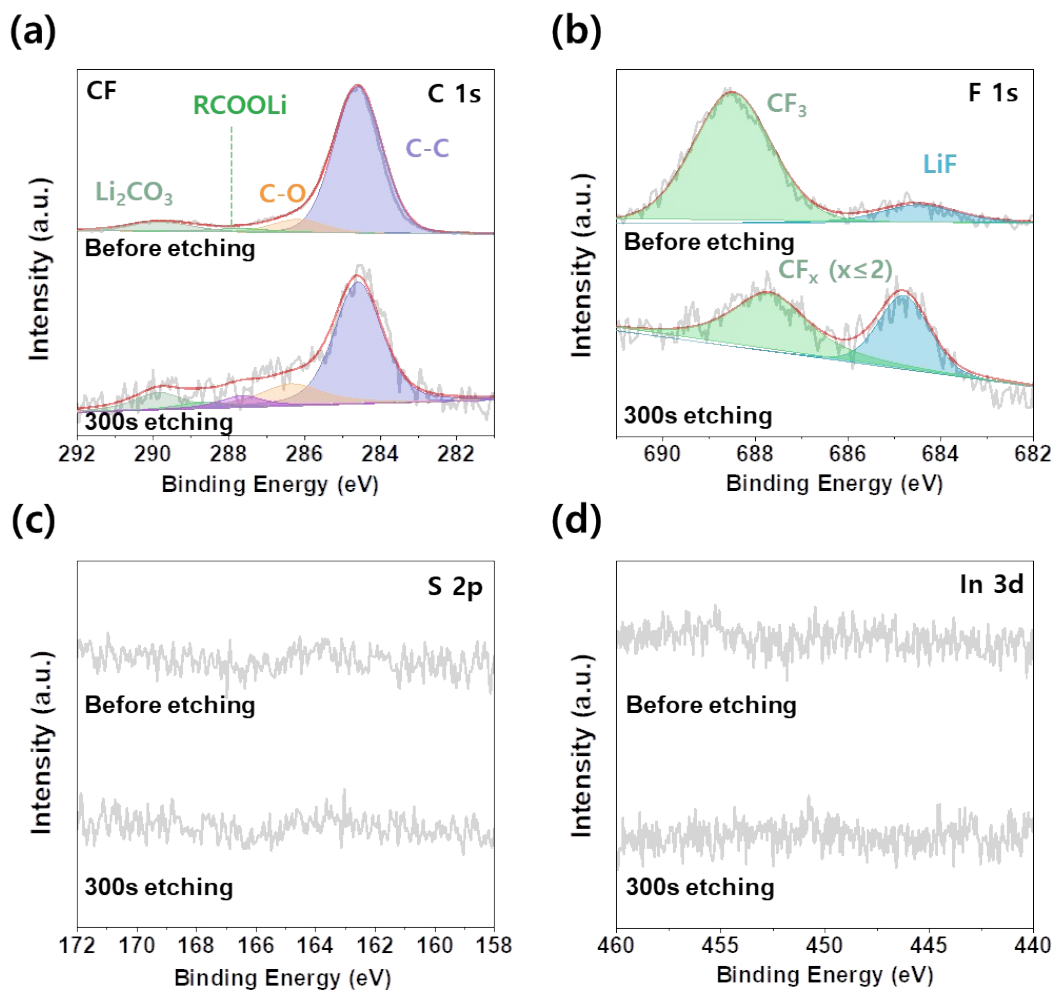

**Fig. S11** The high-resolution (a) C 1s, (b) F 1s, (c) S 2p and (d) In 3d XPS spectra of CF after electrochemical SEI formation.

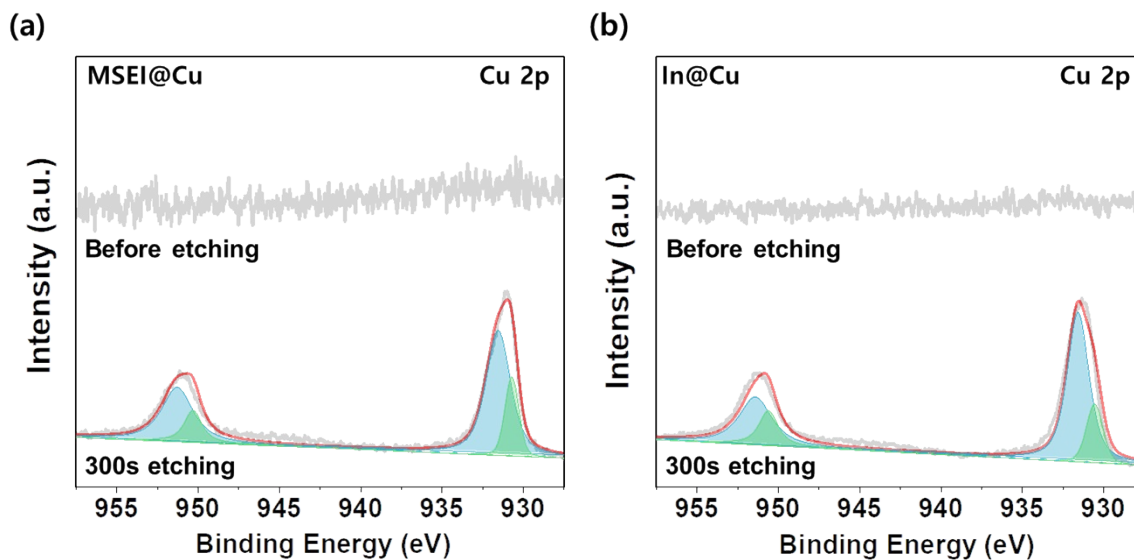

**Fig. S12** The high-resolution Cu 2p XPS spectra of (a) MSEI@Cu and (b) In@Cu after electrochemical SEI formation.

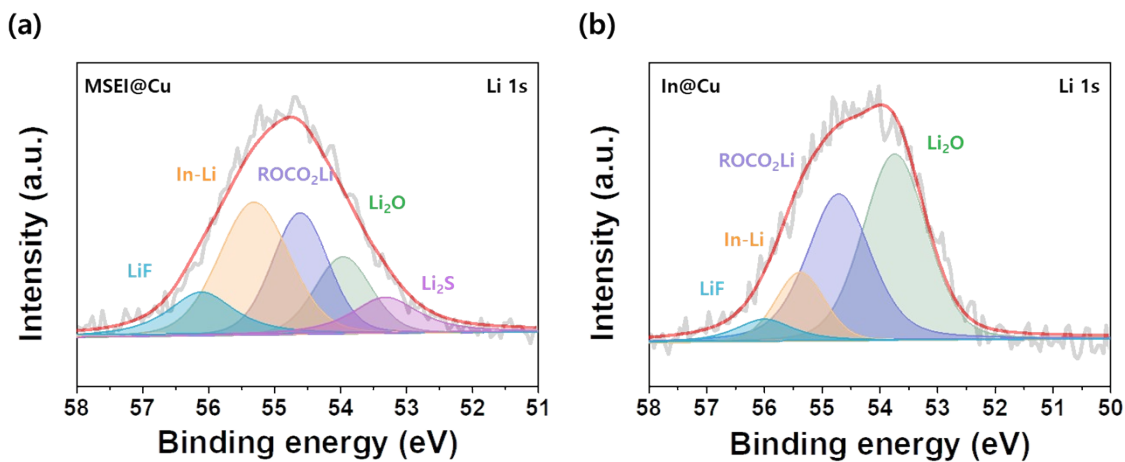

**Fig. S13** The high-resolution Li 1s XPS spectra of (a) MSEI@Cu and (b) In@Cu after electrochemical SEI formation.

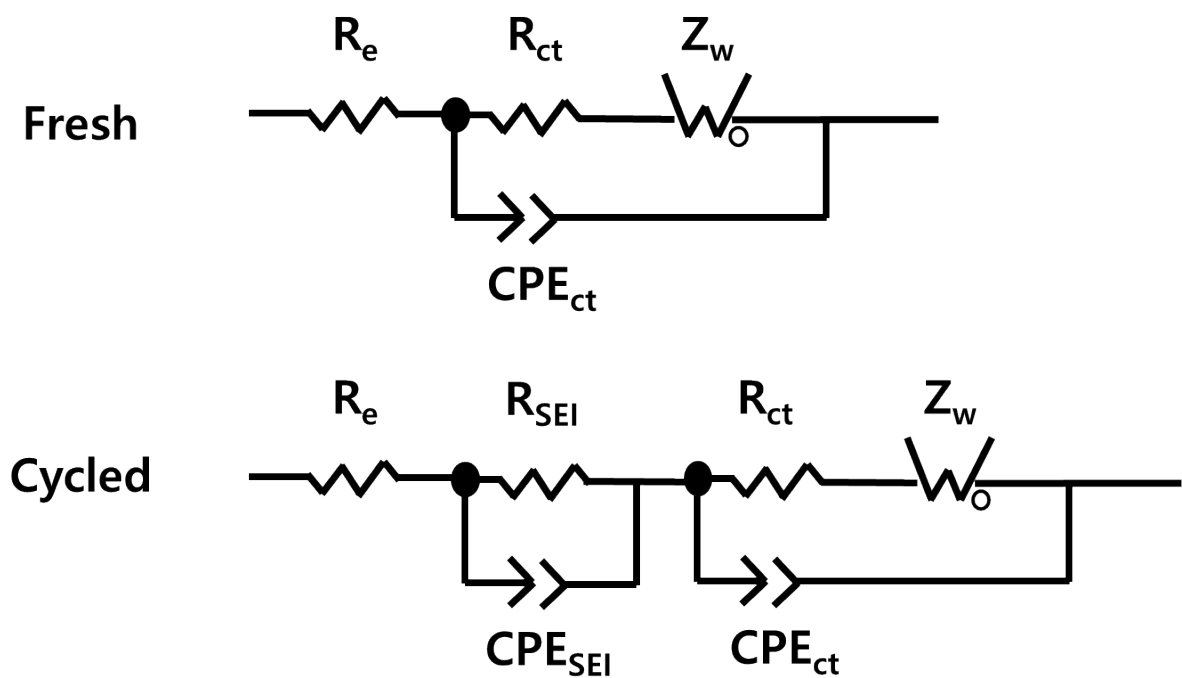

**Fig. S14** EIS Equivalent circuit models.

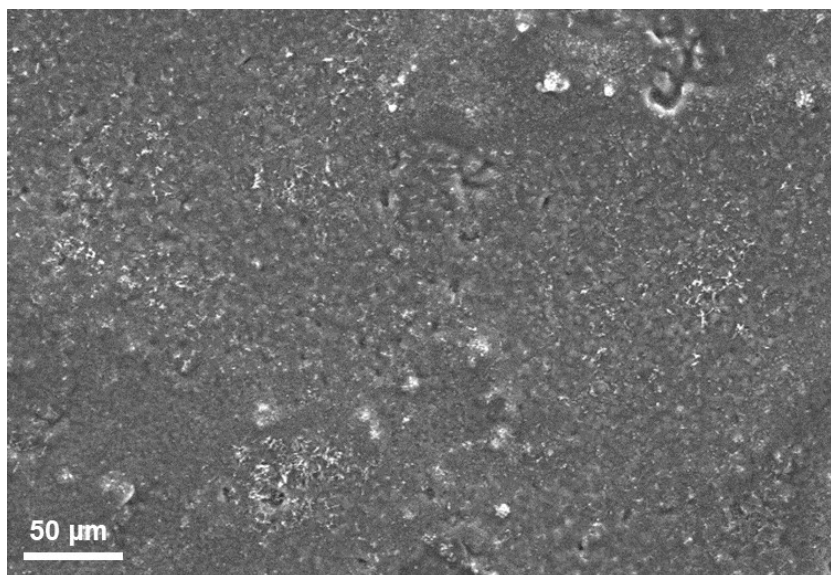

**Fig. S15** The top SEM image of Li-MSEI@Cu.

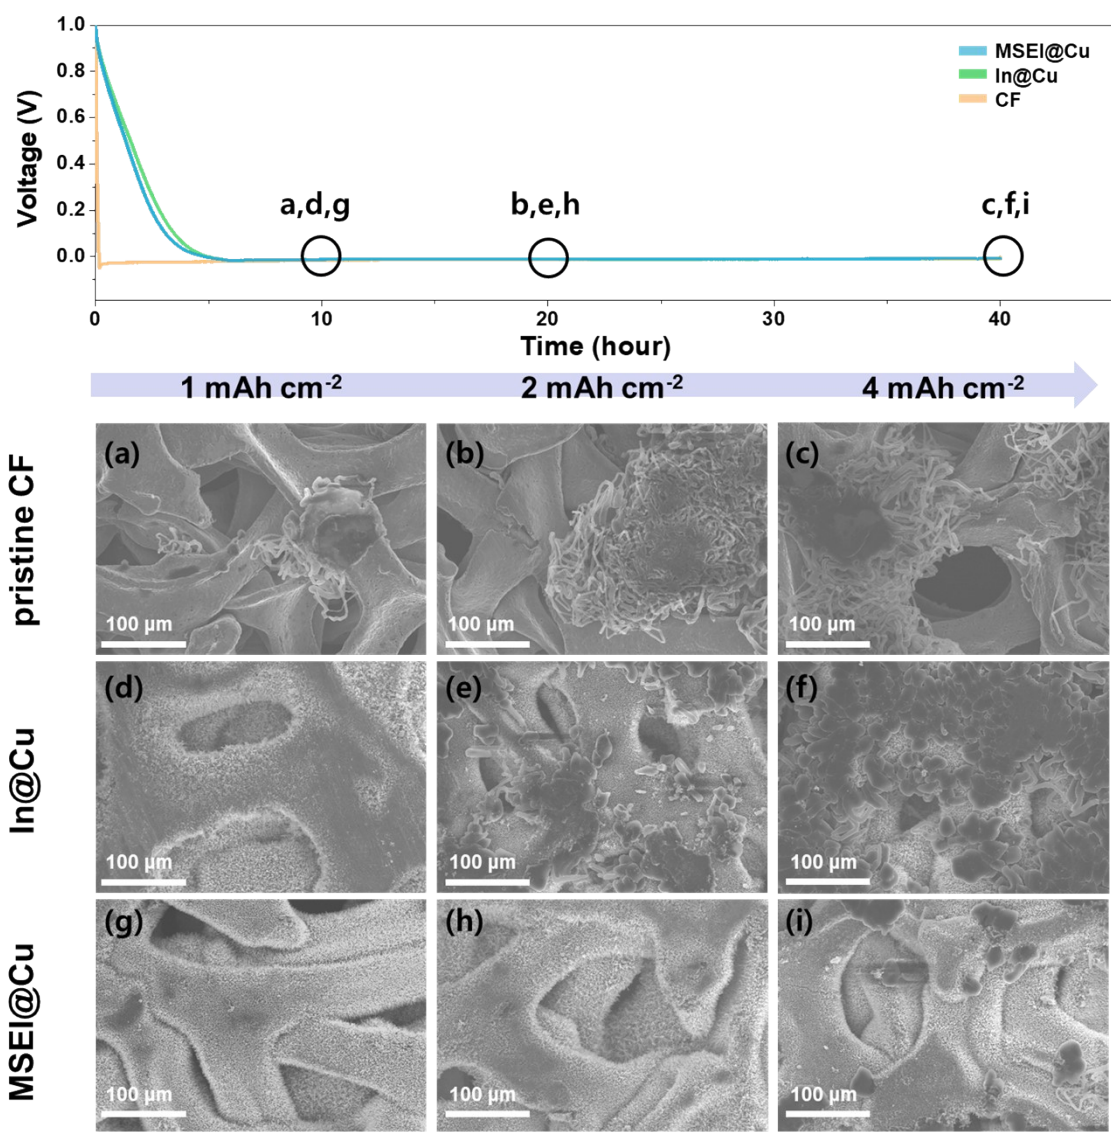

**Fig. S16** SEM images (a–c) pristine CF, (d–f) In@Cu and (g–i) MSEI@Cu electrodes after Li electrodeposition at  $0.1 \text{ mA cm}^{-2}$ : (a, d, g)  $1 \text{ mAh cm}^{-2}$ , (b, e, h)  $2 \text{ mAh cm}^{-2}$ , (c, f, i)  $4 \text{ mAh cm}^{-2}$ .

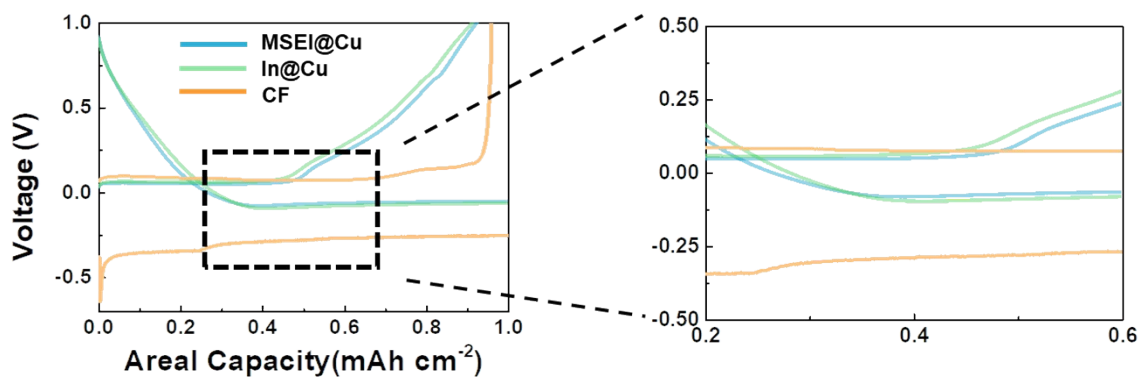

**Fig. S17** The initial voltage profiles of MSEI@Cu, In@Cu and CF at  $3 \text{ mA cm}^{-2}$  and  $1 \text{ mAh cm}^{-2}$ .

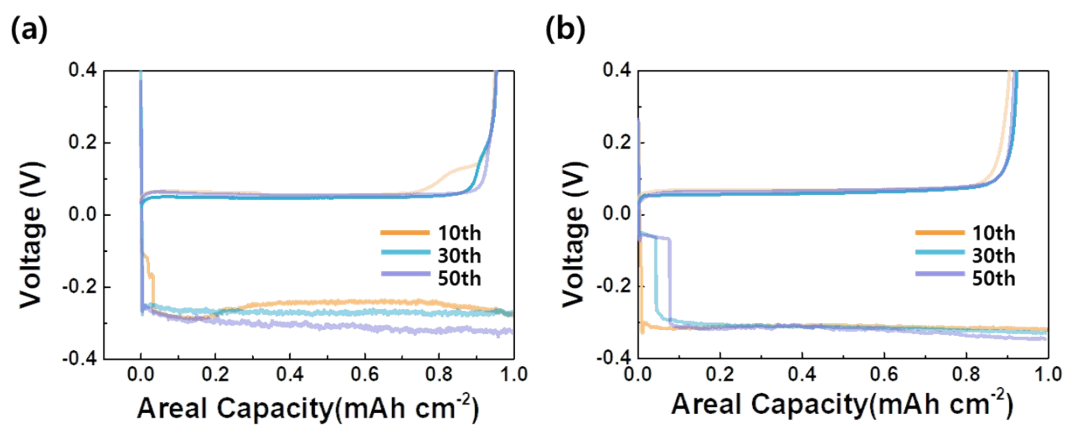

**Fig. S18** Voltage profiles of CF at 10, 30 and 50th cycle at a current density of (a)  $3 \text{ mA cm}^{-2}$  and (b)  $5 \text{ mA cm}^{-2}$  with a fixed capacity of  $1 \text{ mAh cm}^{-2}$ .

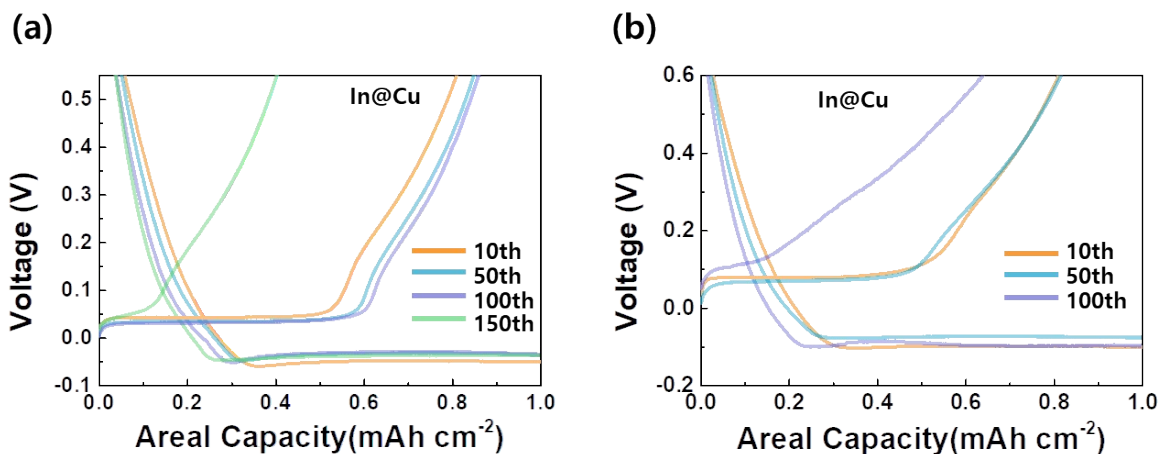

**Fig. S19** Voltage profiles of In@Cu at 10, 50, 100 and 150th cycle at a current density of (a) 3 mA cm<sup>-2</sup> and (b) those at 10, 50 and 100th cycle at a current density of 5 mA cm<sup>-2</sup>. Both profiles operated under a fixed capacity of 1 mAh cm<sup>-2</sup>.

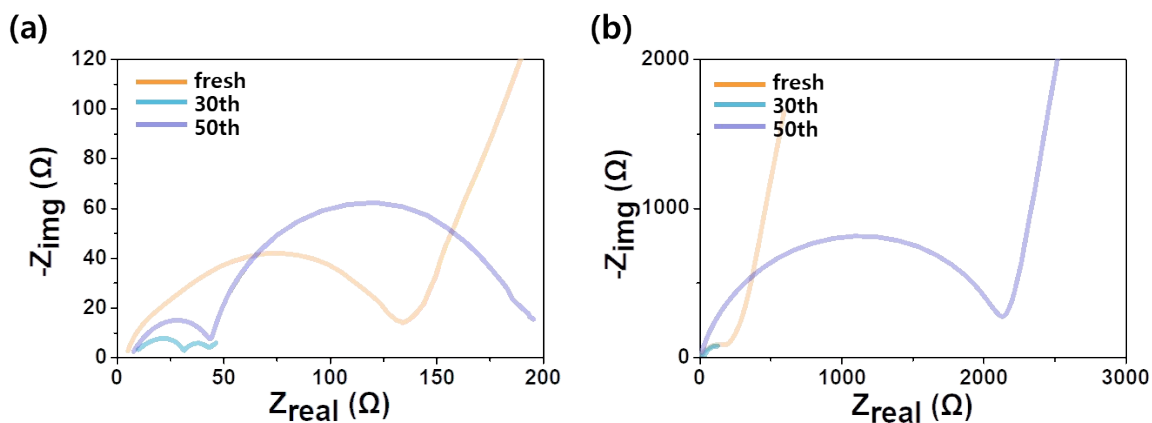

**Fig. S20** Nyquist plots of (a) In@Cu (b) CF at fresh state, 30 and 50th cycle.

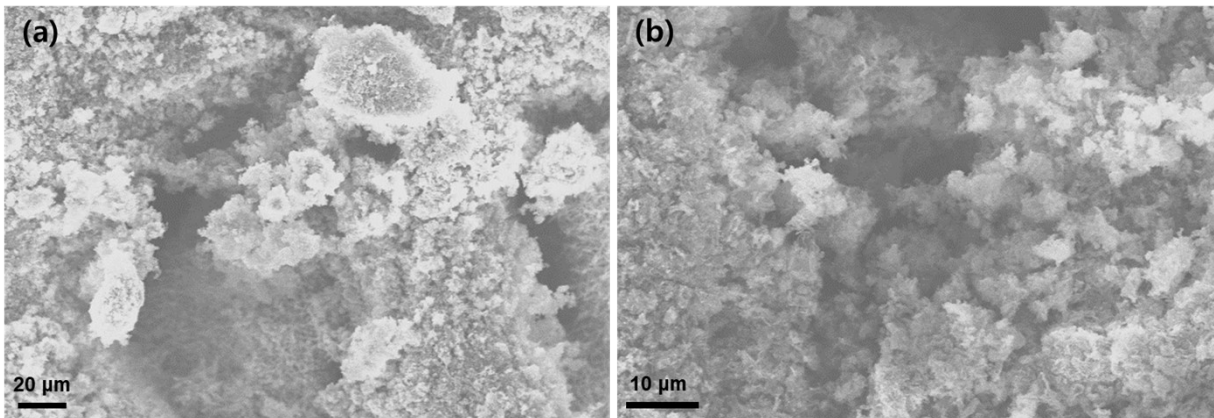

**Fig. S21** The SEM images of In@Cu after 50 cycles at  $3 \text{ mA cm}^{-2}$  and  $1 \text{ mAh cm}^{-2}$ .

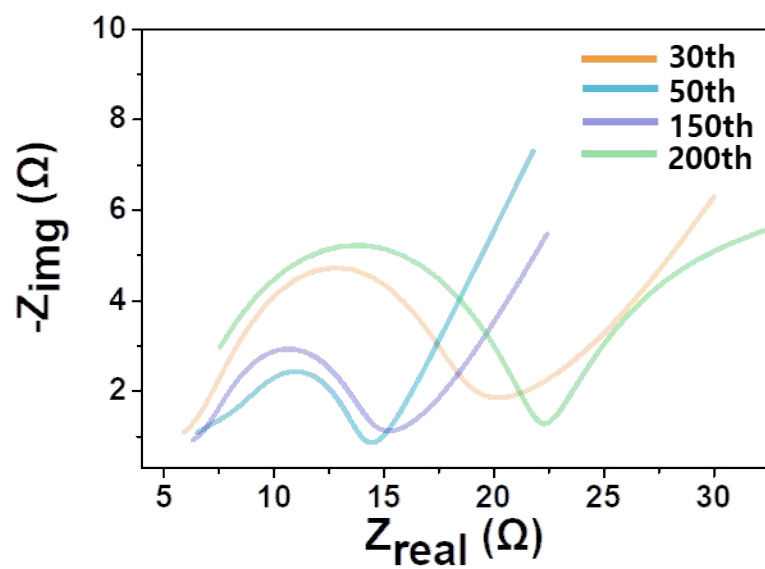

**Fig. S22** Nyquist plots of bulk Li symmetric cells after 30, 50, 150, 200th cycle at a current density of  $1 \text{ mA cm}^{-2}$  and a capacity of  $1 \text{ mAh cm}^{-2}$ .

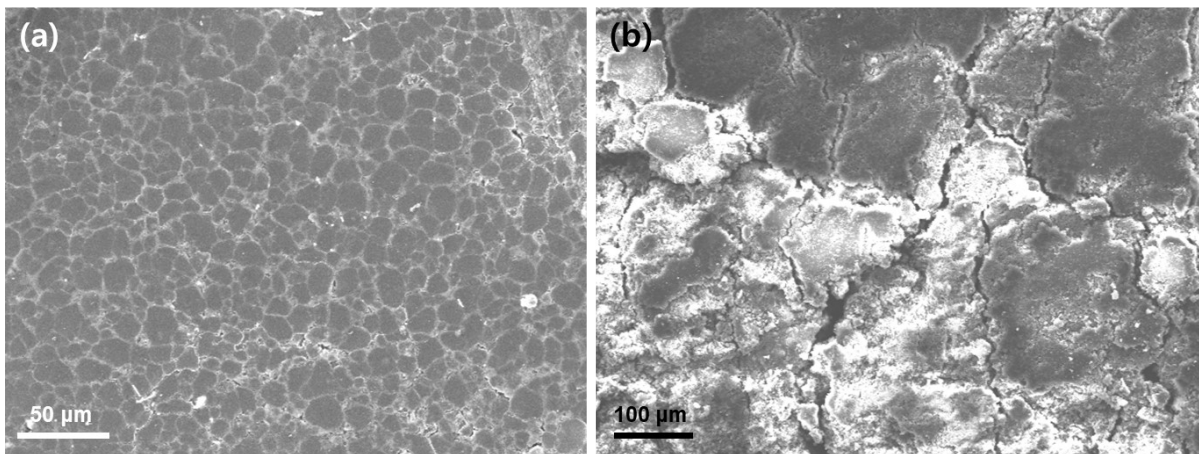

**Fig. S23** Low-magnification SEM images of (a) Li-MSEI@Cu and (b) bulk Li electrodes after 200 cycles at  $1 \text{ mA cm}^{-2}$  and  $1 \text{ mAh cm}^{-2}$ .

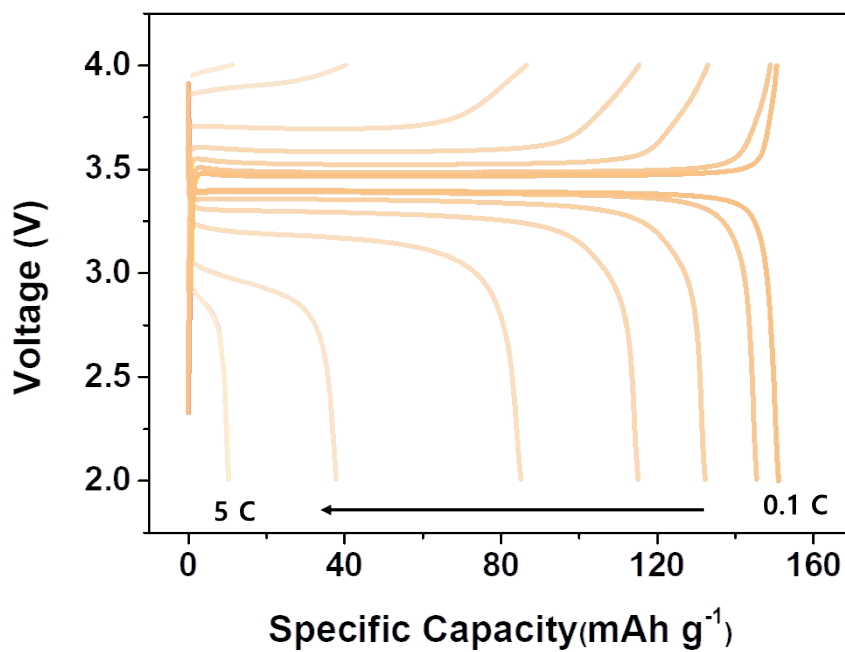

**Fig. S24** Representative voltage profiles of the rate-performance of bulk Li|LFP full cell at various C-rates.



| Name | MSEI@Cu<br>(Atomic %) | In@Cu<br>(Atomic %) |
|------|-----------------------|---------------------|
| S2p  | 6.43                  | 0                   |
| C1s  | 22.99                 | 40.96               |
| In3d | 6.12                  | 15.53               |
| O1s  | 45.7                  | 40.48               |
| Cu2p | 18.76                 | 3.03                |

**Table S1.** XPS peak table of Cu@MSEI and In@Cu

| Name | Li-MSEI@Cu<br>Before Etching<br>(Atomic %) | Li-In@Cu<br>Before Etching<br>(Atomic %) | Li-MSEI@Cu<br>After Etching<br>(Atomic %) | Li-In@Cu<br>After Etching<br>(Atomic %) |
|------|--------------------------------------------|------------------------------------------|-------------------------------------------|-----------------------------------------|
| Li1s | 32.93                                      | 26.76                                    | 45.02                                     | 45.19                                   |
| S2p  | 1.64                                       | 0                                        | 1.93                                      | 0                                       |
| C1s  | 27.73                                      | 37.62                                    | 11.1                                      | 18.76                                   |
| In3d | 0                                          | 0                                        | 1.77                                      | 1.08                                    |
| O1s  | 33.64                                      | 31.84                                    | 34.54                                     | 28.74                                   |
| F1s  | 3.07                                       | 2.83                                     | 2.99                                      | 1.88                                    |
| Cu2p | 0                                          | 0                                        | 2.13                                      | 4.35                                    |

**Table S2.** XPS peak table of Li-Cu@MSEI and Li-In@Cu

|    | Electrode name                                    | LiFePO <sub>4</sub> loading mass<br>(mg cm <sup>-2</sup> ) | Cycle number | Reference |
|----|---------------------------------------------------|------------------------------------------------------------|--------------|-----------|
| 1  | CuFePBA-150/ Cu                                   | 1.5                                                        | 500          | [S1]      |
|    | CuFePBA-150/ Cu                                   | 12.4                                                       | 120          | [S1]      |
| 2  | 3D Li-Zn@Cu                                       | 2                                                          | 250          | [S2]      |
| 3  | LVCf@Li anodes                                    | 12                                                         | 200          | [S3]      |
| 4  | Li <sub>2</sub> O@CuNA/CF                         | 5                                                          | 500          | [S4]      |
| 5  | Li@Cu <sub>x</sub> O-7                            | 8                                                          | 500          | [S5]      |
|    | Li@Cu <sub>x</sub> O-7                            | 12                                                         | 100          | [S5]      |
| 6  | Ti <sub>3</sub> C <sub>2</sub> T <sub>x</sub> @Cu | 2                                                          | 225          | [S6]      |
| 7  | CuSnAl@Cu                                         | 3                                                          | 300          | [S7]      |
| 8  | Cu-Ag alloy                                       | 2.8                                                        | 500          | [S8]      |
| 9  | Cu <sub>3</sub> Sn/CP                             | 12                                                         | 100          | [S9]      |
| 10 | 3D porous<br>ZnO-nVF@Cu                           | 1                                                          | 200          | [S10]     |
| 11 | Our work                                          | 6.5                                                        | 500          |           |
|    | Our work                                          | 13.5                                                       | 200          |           |

**Table S3.** Comparison of long-term cycling performance of LFP-based full cells between our work and other previously reported 3D Cu hosts.

## References

- [S1] Y. Cai, B. Qin, J. Lin, C. Li, X. Si, J. Cao, J. Qi, *ACS Appl. Mater. Interfaces*, 2021, **13**, 23803.
- [S2] Y. Ye, Y. Liu, J. Wu, Y. Yang, *J. Power Sources*, **2020**, 472, 228520.
- [S3] T. Liu, S. Chen, W. Sun, L.P. Lv, F.H. Du, H. Liu, Y. Wang, *Adv. Funct. Mater.*, 2021, **31**, 2008514.
- [S4] L. Tan, X. Li, M. Cheng, T. Liu, Z. Wang, H. Guo, G. Yan, L. Li, Y. Liu, J. Wang, *J. Power Sources*, 2020, **463**, 228178.
- [S5] Y. Nie, X. Dai, J. Wang, Z. Qian, Z. Wang, H. Guo, G. Yan, D. Jiang, R. Wang, *J. Energy Chem.*, 2022, **75**, 285.
- [S6] L. Zhang, Q. Jin, K. Zhao, X. Zhang, L. Wu, *ACS Appl. Energy Mater.*, 2022, **5**, 2514.
- [S7] Y. Lv, Q. Zhang, C. Li, C. Ma, W. Guan, X. Liu, Y. Ding, *ACS Sustain-able Chem. Eng.*, 2022, **10**, 7188.
- [S8] Y. Liu, S. Huang, Q. Meng, Y. Fan, B. Wang, Y. Yang, G. Cao, H. Zhang, *J Alloys Compd*, 2021, **885**, 160882.
- [S9] J. Jiang, J. Lu, Y. Ou, G. Liu, S. Lu, Y. Jiang, B. Zhao, J. Zhang, *ACS Appl. Mater. Interfaces*, 2022, **14**, 2930.
- [S10] G. Luo, X. Yin, D. Liu, A. Hussain, F. Liu, X. Cai, *ACS Appl. Mater. Interfaces*, 2022, **14**, 33400.
